# Supplementary material for: Time-gated triplet-state optical spectroscopy to decipher organic luminophores embedded in rigid matrices
Source: Royal Society of Chemistry journal article supplement (doi:10.1039/c8cp03952f), 2018-01-01
Supplement: c8cp03952f1.pdf [file c8cp03952f1.pdf]

## Supporting Information

### **Time-gated triplet-state optical spectroscopy to decipher organic luminophores embedded in rigid matrices**

Atul D. Sontakke,<sup>\*,a</sup> Jean-Marie Mouesca,<sup>b</sup> Victor Castaing,<sup>a</sup> Alban Ferrier,<sup>a,c</sup> Mathieu Salaün,<sup>d</sup> Isabelle Gautier-Luneau,<sup>d</sup> Vincent Maurel,<sup>b</sup> Alain Ibanez,<sup>d</sup> and Bruno Viana.<sup>\*,a</sup>

<sup>a</sup> PSL Research University, Chimie ParisTech - CNRS, Institut de Recherche de Chimie Paris, 75005 Paris, France

<sup>b</sup> Univ. Grenoble Alpes, CEA, CNRS, INAC, SyMMES, F-38000 Grenoble, France.

<sup>c</sup> Sorbonne Université, Faculté des Sciences et Ingénierie, UFR 933, F-75005 Paris, France

<sup>d</sup> Univ. Grenoble Alpes, CNRS, Grenoble INP, Institut Néel, 38000 Grenoble France

#### **Supplementary contents**

**Table S1.** S-S transitions, oscillator strengths, and S-T transitions values computed by TD-DFT analysis.

**Scheme S1.** Schematics of phosphorescence, thermally-assisted delayed fluorescence (TADF) and inverse singlet-triplet (iST) mechanisms leading to afterglow luminescence in molecular systems.

**Figure S1.** Steady-state (a) and time-gated (b) luminescence contour maps of SG-500 a-YAB powder. In (a), the diagonal features are excitation pump signals. In time-gated plot (b), data represent the phosphorescence signals at 1 s after ceasing the excitation.

**Figure S2.** Steady-state (a) and time-gated (b) luminescence contour maps of SG-570 a-YAB powder. In (a), the diagonal features are excitation pump signals. In time-gated plot (b), data represent the phosphorescence signals at 0.5 s after ceasing the excitation.

**Figure S3.** Diffuse reflectance spectra of a-YAB powders calcined at different temperatures.

**Figure S4.** Phosphorescence afterglow of a-YAB powders calcined at different temperatures.

**Table S1.** S-S transitions and oscillator strengths, and S-T transitions computed by TD-DFT calculations with B3LYP<sup>1</sup> exchange-correlation potential (20 % Hartree-Fock) and TZ2P basis sets throughout for a selection of poly-aromatic/cyclic molecules (cf. Table S1 of Angew. Chem. Int. Ed. 2017, 56, 13995-13998). The first four models were selected by <sup>13</sup>C and <sup>1</sup>H ENDOR experiments, and the other models are here considered for illustrative purposes. Experiment: Exc(S<sub>0</sub>→S<sub>1</sub>) = 3.7 eV, Exc(S<sub>0</sub>→S<sub>2</sub>) = 4.9 eV, and PhL(T<sub>1</sub>→S<sub>0</sub>) = 2.8 eV.

| Molecular models                                                                                                   | S-S Transitions (eV)                               | S-S Oscillator strength                    | S-T Transitions (eV)                             | Selected by ENDOR |
|--------------------------------------------------------------------------------------------------------------------|----------------------------------------------------|--------------------------------------------|--------------------------------------------------|-------------------|
| 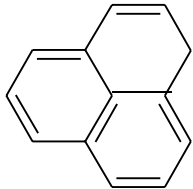<br>Phenalene                     | <b>3.68</b><br>4.16<br><b>4.99</b><br>5.24<br>5.43 | 0.153<br>0.008<br>0.100<br>0.001<br>0.329  | <b>2.38</b><br>3.53<br>3.72<br>4.06<br>4.44      | yes               |
| <br>fluorene                      | 4.53<br>4.75*<br>5.56<br>5.82<br>6.49              | 0.147<br>0.314<br>0.013<br>0.240<br>0.816  | 3.25<br>4.07 (x 2)<br>4.36 (x 2)<br>4.74<br>4.84 | yes               |
| <br>acenaphthene <sup>2</sup>    | 4.27*<br>5.42<br>5.79<br>5.98<br>6.14              | 0.090<br>0.023<br>0.954<br>0.162<br>0.006  | 2.85<br>3.85<br>4.22<br>4.36<br>4.46             | yes               |
| <br>acenaphthylene <sup>3</sup> | 3.11<br>3.89*<br>4.20<br>4.92<br>5.66              | 0.005<br>0.098*<br>0.094<br>0.022<br>0.436 | 2.29<br>2.61<br>3.36<br>4.19<br>4.53             | yes               |
| <br>benzene <sup>4</sup>        | 7.14*<br>7.36                                      | 1.254*<br>0.107                            | 4.03*<br>4.77*                                   | no                |

<sup>1</sup> A. D. Becke, *Journal of Chemical Physics*, 1993, **98**, 1372-1377 ; C. T. Lee, W. T. Yang and R. G. Parr, *Physical Review B*, 1988, **37**, 785-789.

<sup>2</sup> Experimental values : S-S → 4.29. Source : B. Dick & G. Hohlneicher, *Chem. Phys. Lett.* 1981, 84, 471-478.

<sup>3</sup> Experimental values (n-pentane, 77 K): S-S → 2.66 (0.004), 3.66 (0.165), 3.85, 4.51 (0.005). Source : J. Banisaukas *et al.*, *J. Phys. Chem. A* 2003, 107, 782-793.

<sup>4</sup> Experimental values (gas-phase): S-S → 6.94 (0.80); S-T → 3.94, 4.76. Source : H. H. Heinze *et al.*, *J. Chem. Phys.*, Vol. 113, 2088-2099.

|                                                                                                                |                                              |                                                    |                                       |    |
|----------------------------------------------------------------------------------------------------------------|----------------------------------------------|----------------------------------------------------|---------------------------------------|----|
| 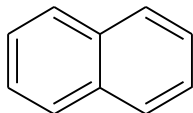<br>naphthalene <sup>5</sup>  | 4.42*<br>5.98*<br>6.16*<br>6.64<br>7.24      | 0.059<br>1.131<br>0.194<br>0.020<br>0.059          | 2.91<br>4.02<br>4.27<br>4.35<br>4.49  | No |
| <br>anthracene <sup>6</sup>   | 3.25*<br>5.23*<br>5.82<br>6.01<br>6.81       | 0.056<br>2.034<br>0.085<br>0.016<br>0.301          | 1.97<br>3.43<br>3.53<br>3.72<br>4.24  | No |
| <br>phenanthrene <sup>7</sup> | 4.25*<br>4.74<br>4.95<br>5.11<br>5.17        | 0.062*<br>0.108<br>0.626<br>0.019<br>0.100         | 2.94*<br>3.53<br>3.63<br>3.86<br>4.07 | No |
| <br>triphenylene <sup>8</sup> | 4.31<br>4.76*<br>4.98<br>5.70<br>6.07        | 0.005<br>0.784<br>0.705<br>0.012<br>0.272          | 3.05*<br>3.56<br>3.70<br>3.85<br>4.24 | no |
| <br>fluoranthene            | 4.14<br>4.32<br>4.59<br>5.42<br>5.66<br>5.83 | 0.037<br>0.071<br>0.038<br>0.037<br>0.023<br>0.559 | 2.69<br>2.86<br>3.86<br>3.98<br>4.13  | no |
| <br>pyrene <sup>9</sup>     | 3.71*<br>4.60*<br>5.43                       | 0.267<br>0.267<br>0.806                            | 2.29<br>3.47<br>3.61                  | no |

<sup>5</sup> Experimental values (gas-phase): S-S → 4.45 (0.102/p), 5.89 (1.3/β), 6.14 (0.3). Source: G. Mallocci *et al.*, Chemical Physics 340 (2007) 43–58.

<sup>6</sup> Experimental values (gas-phase): S-S → 3.45 (p), 5.24 (β). Source: G. Mallocci *et al.*, Chemical Physics 340 (2007) 43–58.

<sup>7</sup> Experimental values (gas-phase): S-S → 4.24 (p); S-T → 2.70. Source: M. Parac *et al.*, Chemical Physics 292 (2003) 11–21.

<sup>8</sup> Experimental values (gas-phase): S-S → 3.89, 4.54; S-T → 2.95. Source: M. Parac *et al.*, Chemical Physics 292 (2003) 11–21.

<sup>9</sup> (a) Experimental values (water solution; w = weak, s = strong): S-S → 232<sup>w</sup> (5.34 eV), 242<sup>s</sup> (5.12 eV), 252<sup>w</sup> (4.92 eV), 260<sup>w</sup> (4.77 eV), 272<sup>s</sup> (4.56 eV)\*, 308<sup>w</sup> (4.03 eV), 320<sup>s</sup> (3.88 eV) and 336<sup>s</sup> (3.69 eV)\* nm. Source: J. Gališínová *et al.*, Acta Fac. Pharm. Univ. Comen. LX, 2013, (1), p. 1-6. (b) Experimental values (gas-phase): S-S → 3.53, 3.71; S-T → 2.08. Source: M. Parac *et al.*, Chemical Physics 292 (2003) 11–21.

|                                                                                                             |       |       |       |    |
|-------------------------------------------------------------------------------------------------------------|-------|-------|-------|----|
| 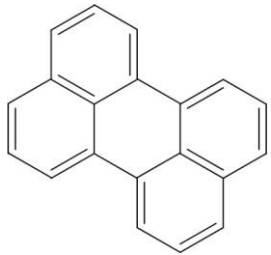<br>perylene <sup>10</sup> | 2.82* | 0.345 | 1.64* | no |
|                                                                                                             | 4.02  | 0.008 | 3.12  |    |
|                                                                                                             | 4.85  | 0.313 | 3.24  |    |
|                                                                                                             | 5.36  | 0.010 | 3.37  |    |
|                                                                                                             | 5.54  | 0.117 | 3.59  |    |

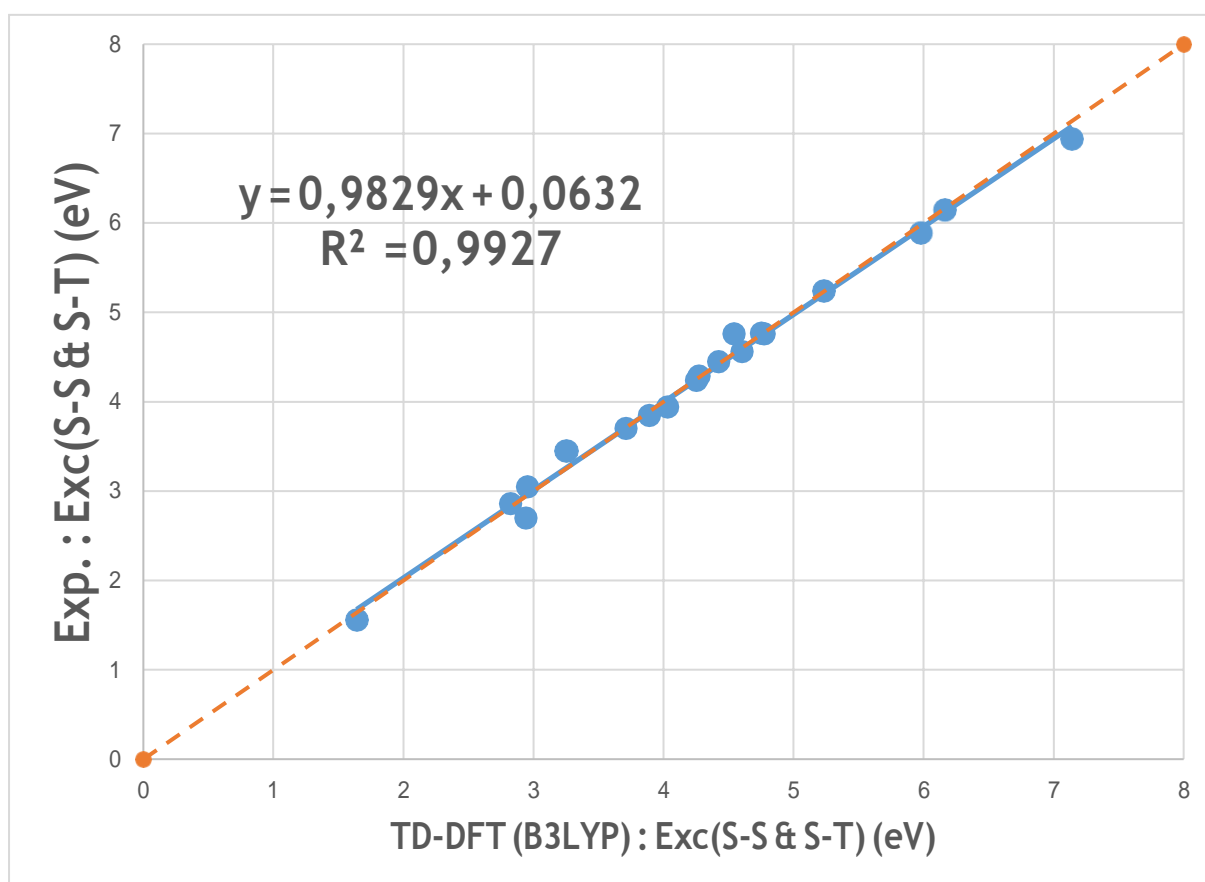

Plot of some of the computed TD-DFT S-S and S-T transitions (marked by \* in the previous table) as a function of experimental data (when available). Blue continuous line: correlation line. Orange plotted line: unity line. Standard deviation:  $\sigma = 0.11$  eV (18 points).

<sup>10</sup> (a) Experimental values (acetonitrile solution): S-S  $\rightarrow$  386 (3.21 eV), 406 (3.05 eV), 433 (2.86 eV)\*, nm. Source: L. Lin *et al.*, *J. Mater. Chem. A*, 2015, 3, 12845–12851. (b) Experimental values (gas-phase): S-S  $\rightarrow$  2.85\*; S-T  $\rightarrow$  1.56\*. Source: M. Parac *et al.*, *Chemical Physics* 292 (2003) 11–21.

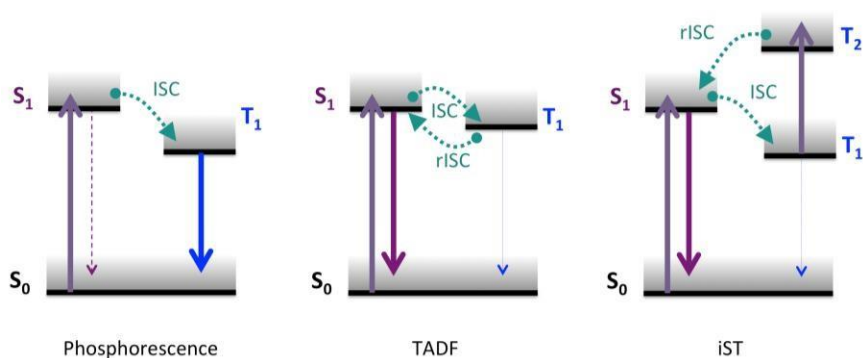

**Scheme S1.** Schematics of phosphorescence, thermally-assisted delayed fluorescence (TADF) and inverse singlet-triplet (iST) mechanisms leading to afterglow luminescence in molecular systems.

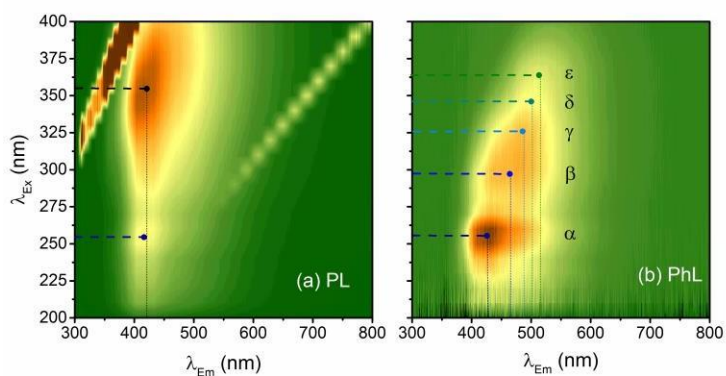

**Figure S1.** Steady-state (a) and time-gated (b) luminescence contour maps of SG-500 a-YAB powder. In (a), the diagonal features are excitation pump signals. In time-gated plot (b), data represent the phosphorescence signals at 1 s after ceasing the excitation.

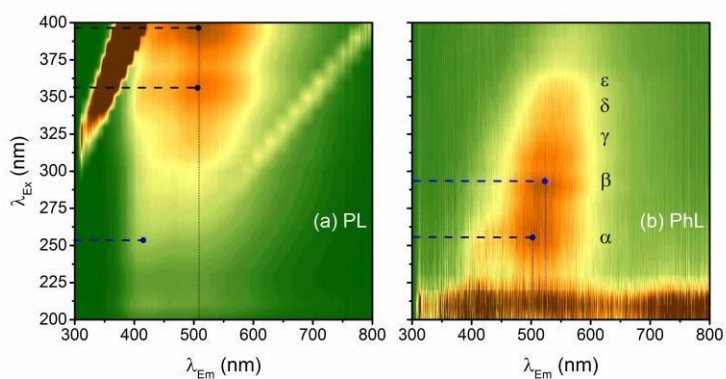

**Figure S2.** Steady-state (a) and time-gated (b) luminescence contour maps of SG-570 a-YAB powder. In (a), the diagonal features are excitation pump signals. In time-gated plot (b), data represent the phosphorescence signals at 0.5 s after ceasing the excitation.

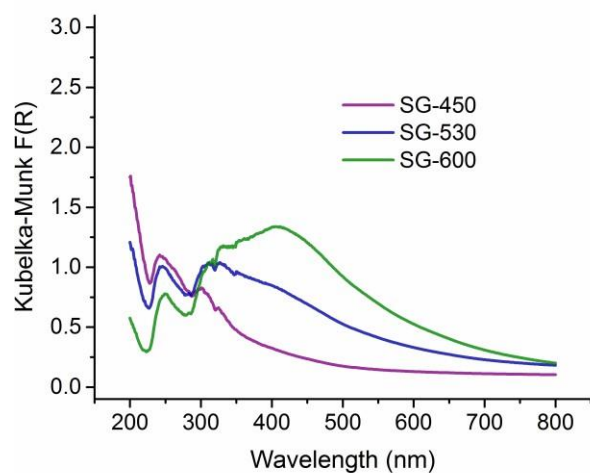

**Figure S3.** Diffuse reflectance spectra of a-YAB powders calcined at different temperatures.

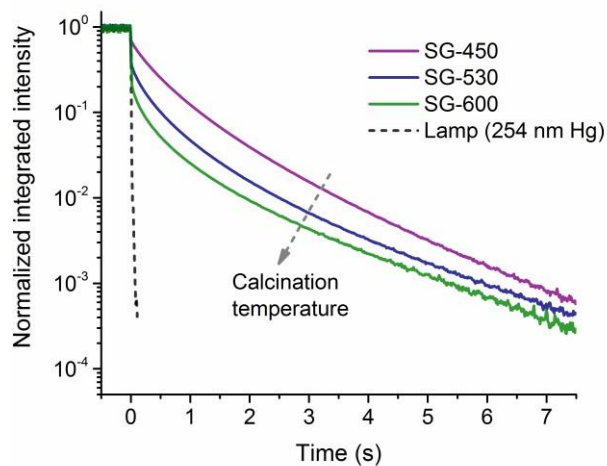

**Figure S4.** PL normalized phosphorescence afterglow of a-YAB powders calcined at different temperatures. The powders were excited by 254 nm Hg vapor lamp for 1 minute before ceasing the excitation. The lamp decay is also presented in the figure showing the instrument response function after ceasing the lamp excitation. The relative afterglow intensity falls monotonously for samples calcined at higher temperature.
